# Supplementary material
Source: PubMed Central journal article supplement (PMC6615991)
Supplement: NIHMS1529272-supplement-1.pdf [file NIHMS1529272-supplement-1.pdf]

## Supplemental Data:

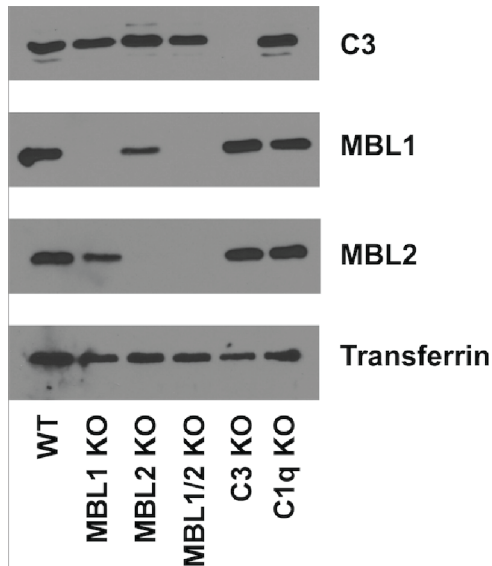

**Supplemental Figure 1. Absence of specific complement proteins from sera of knockout mice.** Sera samples from WT and the indicated knockout mice were prepared and analyzed by western blotting as described in methods. Transferrin was measured as a control for total protein. C3, MBL1, and MBL2 proteins were undetectable specifically in mice in which the corresponding genes were disrupted.

Gating schemes for C1q, C3 and C4 deposition (gated on live thymocytes):

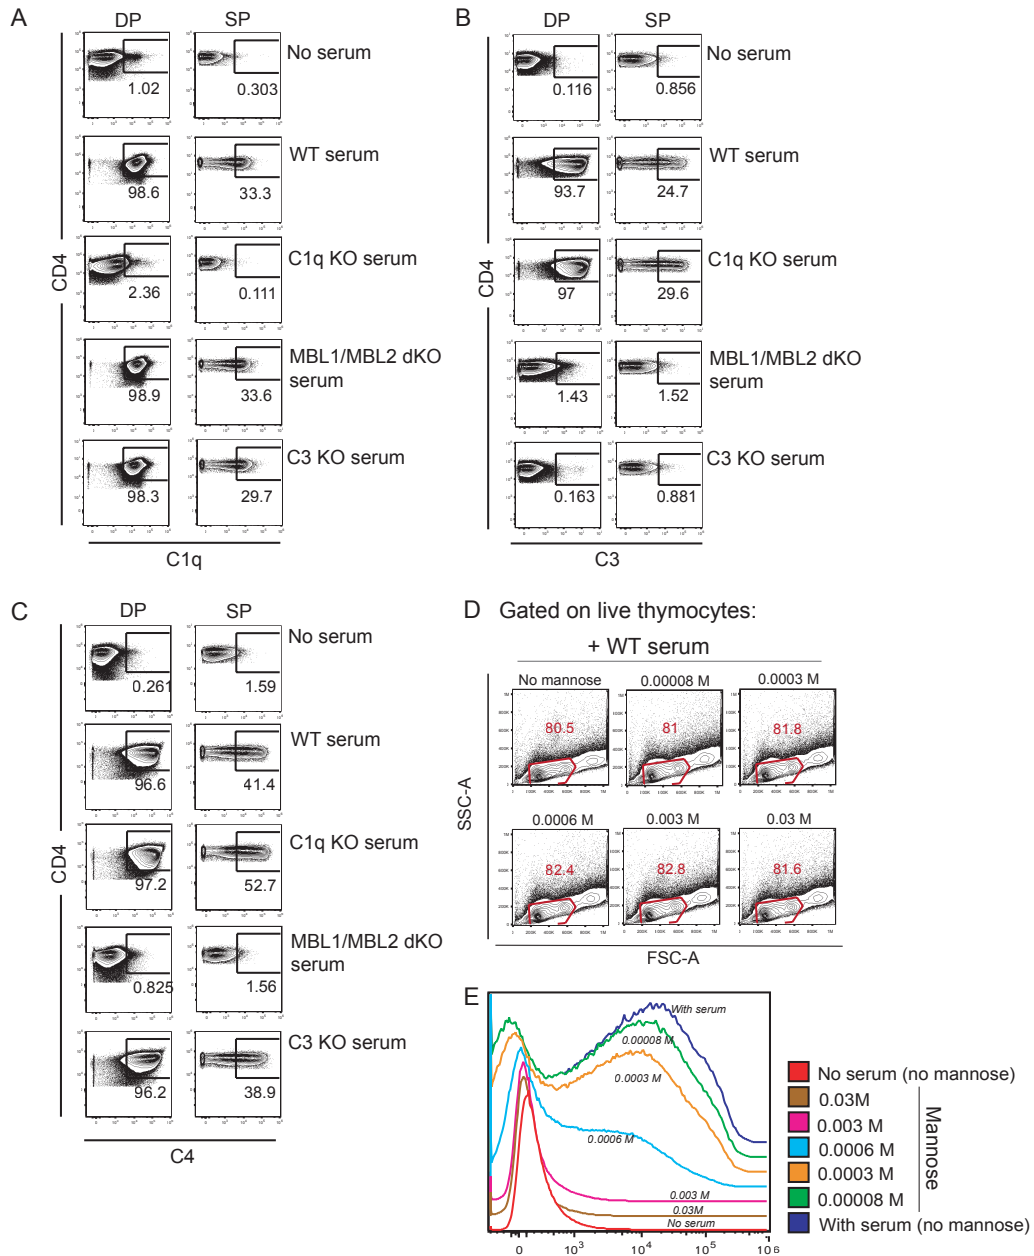

### Supplemental Figure 2. Gating scheme for complement binding on DP and SP

thymocytes. (A--C) Sera from WT, C1q KO, MBL1/MBL2 dKO and C3 KO mice were incubated thymocytes to assess C1q, C3 and C4 binding respectively with no serum as negative control. (D) Forward and Side scatters of thymocytes incubated with indicated concentrations of D-Mannose. (E) Sera mixed with various concentrations of D-Mannose were incubated with thymocytes for assessment of C3 binding with no serum as negative control.

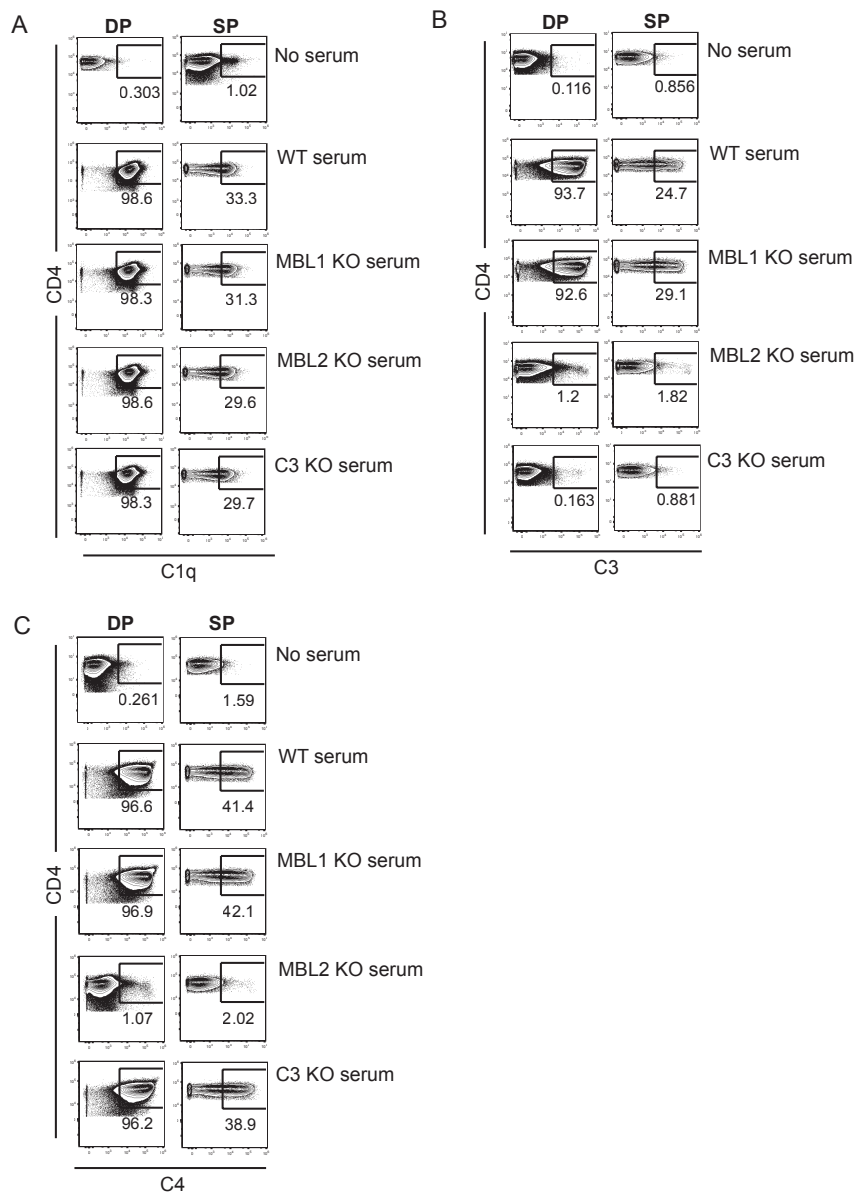

**Supplemental Figure 3. Gating scheme for complement binding on DP and SP**

**thymocytes. (A--C)** Sera from WT, MBL1 KO, MBL2 KO and C3 KO mice were incubated thymocytes to assess C1q, C3 and C4 binding respectively with no serum as negative control. (

**A Gating Strategy for analysis of cell death parameters on CD4<sup>+</sup>CD62L<sup>+</sup>CD44<sup>-</sup> naive T cells**

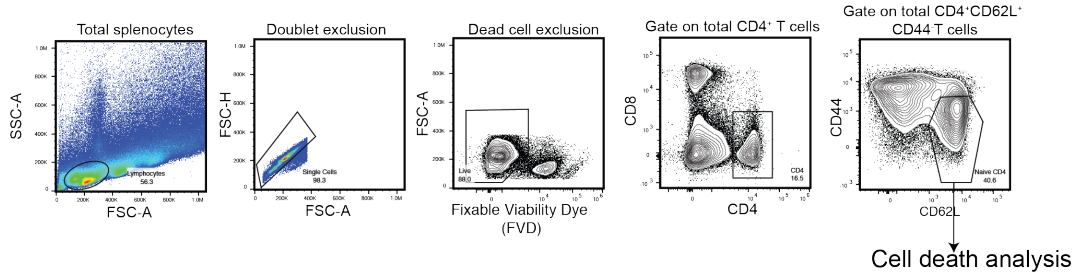

**B Gating Strategy for detection of complement protein C3 on CD4<sup>+</sup>CD62L<sup>+</sup>CD44<sup>-</sup>CD45RB<sup>+</sup> MNTs**

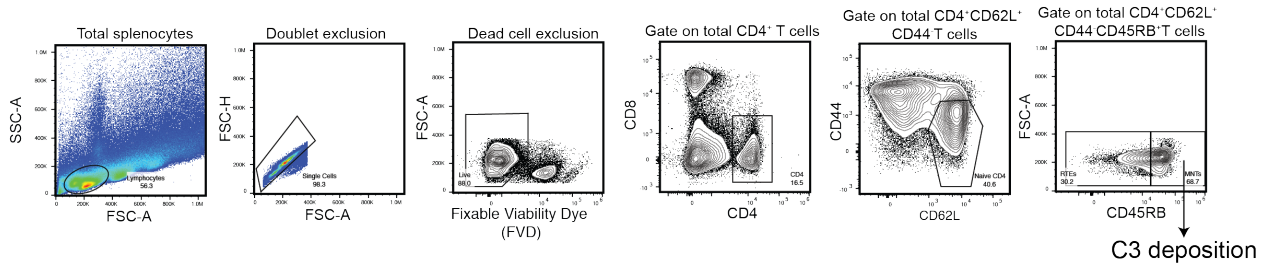

**Supplemental Figure 4: Gating scheme for CD4<sup>+</sup> total naive and mature naive T cells. (A)**

For cell stress and death analysis, lymphocytes were gated based on SSC and FSC. For BODIPY C-11 analysis, live cells (Annexin-V<sup>-</sup>FVD<sup>-</sup>) were gated last. For all other parameters, live cells were selected after exclusion of doublets. **(B)** For C3 deposition analysis, MNTs were distinguished from RTEs by high expression of CD45RB.
